# Supplementary material
Source: PubMed Central journal article supplement (PMC2721792)
Supplement: blood-2009-03-207944_1.pdf [file blood-2009-03-207944_1.pdf]

| Probeset     | Gene Symbol   | Gene Name                                                                   | Mean signal,<br>control<br>samples | Mean signal,<br>GATA1<br>samples | Fold<br>change |
|--------------|---------------|-----------------------------------------------------------------------------|------------------------------------|----------------------------------|----------------|
| 1416193_at   | Car1          | carbonic anhydrase 1                                                        | 6                                  | 2130                             | 336            |
| 1436717_x_at | Hbb-y         | hemoglobin Y, beta-like embryonic chain                                     | 42                                 | 13812                            | 331            |
| 1448716_at   | Hba-x         | hemoglobin X, alpha-like embryonic chain in Hba complex                     | 4                                  | 1252                             | 321            |
| 1417184_s_at | Hbb-b1        | hemoglobin, beta adult major chain                                          | 78                                 | 20577                            | 265            |
| 1424968_at   | 2210023G05Rik | RIKEN cDNA 2210023G05 gene                                                  | 7                                  | 1421                             | 197            |
| 1435386_at   | Vwf           | Von Willebrand factor homolog                                               | 5                                  | 890                              | 168            |
| 1449077_at   | Eraf          | erythroid associated factor                                                 | 117                                | 16507                            | 141            |
| 1454622_at   | Slc38a5       | solute carrier family 38, member 5                                          | 4                                  | 471                              | 129            |
| 1422920_at   | Cldn13        | claudin 13                                                                  | 8                                  | 762                              | 101            |
| 1438672_at   | Parvb         | parvin, beta                                                                | 6                                  | 567                              | 98             |
| 1450377_at   | LOC640441     | similar to thrombospondin 1                                                 | 36                                 | 2558                             | 70             |
| 1452757_s_at | Hba-a1        | hemoglobin alpha, adult chain 1                                             | 186                                | 12312                            | 66             |
| 1416662_at   | Sardh         | sarcosine dehydrogenase                                                     | 14                                 | 903                              | 63             |
| 1435287_at   | Add2          | adducin 2 (beta)                                                            | 8                                  | 428                              | 57             |
| 1423016_a_at | Gypa          | glycophorin A                                                               | 24                                 | 1139                             | 47             |
| 1418909_at   | Ermap         | erythroblast membrane-associated protein                                    | 4                                  | 200                              | 47             |
| 1452666_a_at | Tmcc2         | transmembrane and coiled-coil domains 2                                     | 4                                  | 175                              | 43             |
| 1437990_x_at | Hbb-bh1       | hemoglobin Z, beta-like embryonic chain                                     | 380                                | 15825                            | 42             |
| 1455618_x_at | Tspan33       | tetraspanin 33                                                              | 12                                 | 491                              | 39             |
| 1431609_a_at | Acp5          | acid phosphatase 5, tartrate resistant                                      | 13                                 | 506                              | 39             |
| 1450556_at   | Spnb1         | spectrin beta 1                                                             | 15                                 | 505                              | 35             |
| 1421811_at   | Thbs1         | thrombospondin 1                                                            | 429                                | 14310                            | 33             |
| 1426517_at   | Gnaz          | guanine nucleotide binding protein, alpha z subunit                         | 15                                 | 456                              | 31             |
| 1427357_at   | Cda           | cytidine deaminase                                                          | 5                                  | 125                              | 27             |
| 1416740_at   | Col5a1        | procollagen, type V, alpha 1                                                | 6                                  | 143                              | 25             |
| 1437263_at   | A730089K16Rik | RIKEN cDNA A730089K16 gene                                                  | 12                                 | 267                              | 23             |
| 1424477_at   | BC019731      | cDNA sequence BC019731                                                      | 12                                 | 260                              | 22             |
| 1436853_a_at | Snca          | synuclein, alpha                                                            | 10                                 | 217                              | 21             |
| 1419014_at   | Rhag          | Rhesus blood group-associated A glycoprotein                                | 15                                 | 325                              | 21             |
| 1417150_at   | Slc6a4        | solute carrier family 6 (neurotransmitter transporter, serotonin), member 4 | 5                                  | 97                               | 20             |
| 1417061_at   | Slc40a1       | solute carrier family 40 (iron-regulated transporter), member 1             | 6                                  | 119                              | 18             |
| 1423344_at   | Epore         | erythropoietin receptor                                                     | 29                                 | 514                              | 18             |
| 1418600_at   | Klf1          | Kruppel-like factor 1 (erythroid)                                           | 242                                | 4231                             | 18             |
| 1451782_a_at | Slc29a1       | solute carrier family 29 (nucleoside transporters), member 1                | 4                                  | 67                               | 17             |
| 1416589_at   | Sparc         | secreted acidic cysteine rich glycoprotein                                  | 38                                 | 662                              | 17             |
| 1444214_at   | Tubb1         | tubulin, beta 1                                                             | 363                                | 6119                             | 17             |
| 1416778_at   | Sdpr          | serum deprivation response                                                  | 7                                  | 107                              | 15             |
| 1451596_a_at | Sphk1         | sphingosine kinase 1                                                        | 6                                  | 83                               | 13             |
| 1428535_at   | 9430020K01Rik | RIKEN cDNA 9430020K01 gene                                                  | 11                                 | 138                              | 13             |
| 1449399_a_at | Il1b          | interleukin 1 beta                                                          | 15                                 | 185                              | 13             |
| 1419232_a_at | Apoa1         | apolipoprotein A-I                                                          | 6                                  | 72                               | 13             |
| 1418480_at   | Ppbp          | pro-platelet basic protein                                                  | 23                                 | 281                              | 12             |
| 1419767_at   | Padi3         | peptidyl arginine deiminase, type III                                       | 19                                 | 230                              | 12             |
| 1430735_at   | 4930424G05Rik | RIKEN cDNA 4930424G05 gene                                                  | 13                                 | 158                              | 12             |
| 1438751_at   | Slc30a10      | solute carrier family 30, member 10                                         | 6                                  | 72                               | 12             |
| 1424268_at   | Smox          | spermine oxidase                                                            | 34                                 | 386                              | 11             |
| 1457307_at   | A330102K04Rik | RIKEN cDNA A330102K04 gene                                                  | 23                                 | 258                              | 11             |
| 1423627_at   | Nqo1          | NAD(P)H dehydrogenase, quinone 1                                            | 7                                  | 80                               | 11             |
| 1422930_at   | Icam4         | intercellular adhesion molecule 4, Landsteiner-Wiener blood group           | 102                                | 1058                             | 10             |
| 1457072_at   | 2410127E16Rik | B-cell CLL/lymphoma 11A                                                     | 17                                 | 173                              | 10             |
