# Supplementary material
Source: PubMed Central journal article supplement (PMC2721792)
Supplement: blood-2009-03-207944_2.pdf [file blood-2009-03-207944_2.pdf]

| <b>Gene</b>   | <b>Sense (5'–3')</b>     | <b>Antisense (5'–3')</b> |
|---------------|--------------------------|--------------------------|
| GATA2         | CCCAAGCGGAGGCTGTCT       | AAGGTGGTGGTTGTCGTCTGA    |
| PU.1          | CCCCACACCGGCCTCAGTCACCAG | CCCCCACGGCCCAGCACCTC     |
| CEBP $\alpha$ | CAGACCAGAAAGCTGAGTTGTGA  | ACCCACAAAGCCCAGAAAC      |
| MPO           | ATCACGGCCTCCCAGGATAC     | CCACTGTGCTAGGCTGTGGAA    |
| MCSFR         | GCGATGTGTGAGCAATGGCAGT   | AGACCGTTTTGCGTAAGACCTG   |
| MAC1          | AGAACACCAAGGACCGTCTGC    | TCTAAAGCCAGGTCATAAGTG    |
| GAPDH         | AGGTTGTCTCCTGCGACTTCA    | CCAGGAAATGAGCTTGACAAA    |
