# Supplementary material
Source: PubMed Central journal article supplement (PMC2721792)
Supplement: blood-2009-03-207944_3.pdf [file blood-2009-03-207944_3.pdf]

| <b>Gene</b> |                        | <b>Sense (5'–3')</b>      | <b>Antisense (5'–3')</b>  |
|-------------|------------------------|---------------------------|---------------------------|
| PU.1        | -20                    | CCTGGTGTGAGTGTCTCGGAATCT  | GGAGAAAAGGCTGCGATTAAGA    |
|             | -19                    | TCCTGCCAACTCACTTGATTATTC  | GAGGGCTGTGTTCCAAAACC      |
|             | -18                    | CCTGAGACTTTGGGGGAACCTT    | CCAGCTGGGCGGCGGAAGTGAT    |
|             | -17                    | TCCAGGCCCTGGCAATAG        | GTGCCCTACACGCTGCTCTAC     |
|             | -16                    | CATGGGAGTCCTAGGGACTGAA    | GGCTCACTTGGGCAAAGCT       |
|             | -14                    | CTGGTGGCAAGAGCGTTTC       | ACGCCAACAGCCCCATTAC       |
|             | -8                     | GAAATCCCCACCTCCATTCC      | TAGGGACCTCAGGCTCTTTGTC    |
|             | -1.4                   | TGTGTGGAGGAAAAGAACTATTGC  | TCTGGGAAAGTGGAAGGGTTT     |
|             | -0.1                   | TTCCTGTAGCGCAAGAGATTTATG  | GCAGGGCCAGCACAAAGTTCC     |
|             | +0.7                   | GCAGTGACCAAGACTGGCTTCT    | TGCAGGGTTTCTGCTCTGTTC     |
| +1.3        | CCTTTACCCTGATCCCCTTCTC | ACCCTCCATCACCTGTGCTT      |                           |
| HS3         |                        | CTAGGGACTGAGAGAGGCTGCTT   | ATGGGACCTCTGATAGACACATCTT |
| GPIIb       |                        | CCTAGTCGACGTCTAGAGGCTATTG | AGTTCCCACCACCGGAAGTT      |
